# Supplementary material for: Ghost ileostomy versus conventional loop ileostomy in patients undergoing low anterior resection for rectal cancer (DRKS00013997): protocol for a randomised controlled trial
Source: HighWire-hosted journal article supplement (doi:10.1136/bmjopen-2020-038930), 2020-10-01
Supplement: bmjopen-2020-038930supp001_data_supplement.pdf [file bmjopen-2020-038930supp001_data_supplement.pdf]

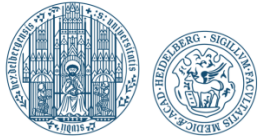

UNIVERSITÄTS  
KLINIKUM  
HEIDELBERG

Universitätsklinikum Heidelberg | Chirurgische Klinik | Im Neuenheimer Feld 110 | 69120 Heidelberg

## Patienteninformation

### GHOST Studie

**Randomisiert, kontrollierte Development-Studie zum Vergleich der Ghost-Ileostomie gegenüber der klassischen Loop-Ileostomie nach tiefer anteriorer Rektumresektion beim Rektumkarzinom – die Ghost-Studie**

(Englischer Titel: Randomized controlled development trial to compare ghost-ileostomy versus conventional loop ileostomy in patients undergoing low anterior resection for rectal cancer – the GHOST-trial)

Sehr geehrte Patientin, sehr geehrter Patient,

wir möchten Sie bitten, sich einen Moment Zeit zu nehmen, um sich von uns über eine aktuelle Studie informieren zu lassen, die an unserer Klinik durchgeführt wird und die zwei unterschiedliche Operationsverfahren im Rahmen der Behandlung einer Krebserkrankung des Mastdarms vergleicht. Bitte lesen Sie diese Informationen sorgfältig durch, damit Sie entscheiden können, ob Sie an der Studie teilnehmen möchten oder nicht. Ihr(e) Studienarzt/Studienärztin wird mit Ihnen die Details zur Studie besprechen und Ihre Fragen beantworten. Danach werden Sie ausreichend Bedenkzeit erhalten, um über eine Teilnahme zu entscheiden. Die mündliche Information zur Studie wird ca. 15 Minuten in Anspruch nehmen.

Wenn Sie an der Studie teilnehmen möchten, bitten wir Sie, die angehängte Einwilligungserklärung zu unterschreiben, wodurch Sie bestätigen, dass Sie die vorgelegten Informationen vollständig verstanden und der Teilnahme an dieser Studie zugestimmt haben.

Mit Ihrer Teilnahme an dieser Studie helfen Sie zum einen, eventuelle Unterschiede bei diesen Verfahren aufzudecken und damit den postoperativen Verlauf zu verbessern. Zum anderen profitieren Sie durch Ihre Teilnahme von einer engmaschigen und standardisierten Nachsorge nach der Operation.

#### Warum wird diese Studie durchgeführt?

Bei Ihnen wurde ein bösartiger Tumor des Mastdarmes (Rektumkarzinom) festgestellt, und nun ist als Therapie die chirurgische Entfernung dieses Darmabschnittes (tiefe anteriore Rektumresektion) mit der Entfernung des umliegenden Fett- und Bindegewebes (totale mesorektale Exzision) geplant. Über die Operation werden Sie gesondert von Ihrem behandelnden Arzt ausführlich aufgeklärt.

#### Studienleiter

Prof. Dr. med. Markus Diener

Klinik für Allgemein-, Viszeral- und Transplantationschirurgie  
Universitätsklinikum Heidelberg  
Im Neuenheimer Feld 110  
69120 Heidelberg  
Tel. 06221-566986

#### Chirurgische Klinik

Prof. Dr. M. W. Büchler  
Geschäftsführender Direktor  
Im Neuenheimer Feld 110  
69120 Heidelberg

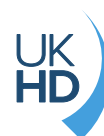

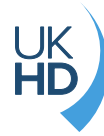

Bei dieser Operation wird in der Regel nach der Entfernung des betroffenen Darmabschnittes eine Neuverbindung zwischen den beiden Darmenden hergestellt (Darmanastomose). Postoperativ besteht das Risiko einer Undichtigkeit der Neuverbindung zwischen den Darmenden (Anastomoseninsuffizienz), was eine unter Umständen schwerwiegende Komplikation darstellt. Daher wird von den meisten Chirurgen wie auch manchen Leitlinien die Anlage eines stuhlableitenden künstlichen Darmausganges (Stoma) im Sinne eines doppelläufigen Ileostomas empfohlen, um die Konsequenzen einer potentiellen Undichtigkeit abzumildern. Das bedeutet, dass eine Dünndarmschlinge (Ileum) vor die Bauchhaut gezogen und als künstlicher Darmausgang ausgeleitet wird. Es gibt dann eine Darmöffnung des zuführenden und eine Darmöffnung des abführenden Darmabschnittes. Auf der anderen Seite müssen bei der Entscheidung zur Anlage dieses schützenden künstlichen Darmausganges (protektiven Ileostomas) jedoch auch stomabedingte Komplikationen berücksichtigt werden, wie z.B. Entzündungen in der Umgebung des künstlichen Darmausgangs, Bauchwandbrüche (Hernien) i.B. des künstlichen Darmausganges oder erhöhte Flüssigkeitsverluste über das Stoma. Hinzu kommt, dass für die Rückverlagerung des künstlichen Darmausganges eine zweite Operation mit ihren entsprechenden Risiken in der Regel etwa 3 Monate nach der ersten Operation notwendig ist. Anhand der vorhandenen Daten aus der Literatur treten Undichtigkeiten der Neuverbindung jedoch nur in bis zu 25% der Fälle auf, so dass viele Patienten auch ohne zwingende Notwendigkeit einen vorübergehenden künstlichen Darmausgang bekommen.

2007 wurde erstmals die Technik einer „virtuellen“ Ileostomie, der sogenannten Ghost-Ileostomie beschrieben, die ein „Vorläufer“-Ileostoma darstellt, welches in einer kurzen chirurgischen Prozedur geöffnet werden kann, wenn Anzeichen einer Undichtigkeit der Neuverbindung am Mastdarm auftreten. Hierdurch kann Patienten potentiell die Anlage eines künstlichen Darmausganges erspart werden, während durch die frühzeitige Öffnung der „virtuellen“ Ileostomie ähnlich einer konventionellen Ileostomie im Falle einer Undichtigkeit deren Komplikationen reduziert werden können. Bislang wurde diese Technik bereits bei mehreren Hundert Patienten getestet, jedoch nie in einer qualitativ hochwertigen Studie zum aktuellen Standard (dem doppelläufigen Ileostoma) verglichen.

Diese Studie soll zunächst die Sicherheit und Durchführbarkeit der sogenannten „Ghost-Ileostomie“ gegenüber dem konventionellen, doppelläufigen Ileostoma vergleichen. Sollte sich die Ghost-Ileostomie als sicher erweisen, wird im Anschluss eine größere randomisiert kontrollierte Studie geplant werden, deren Fallzahl aus den gewonnenen Daten aus dieser Studie berechnet wird.

Die Ihnen vorgestellte Studie untersucht mithilfe von wissenschaftlichen Methoden Unterschiede zwischen den beiden beschriebenen Verfahren in Bezug auf die Sicherheit im Sinne von Komplikationen im Verlauf nach der Operation. Außerdem werden auch Ihre Lebensqualität und postoperative Stuhlfunktion sowie die Raten an Patienten mit Stoma und die Dauer, für die das Stoma vorhanden, ist untersucht.

Die Studie wird von der Klinik für Allgemein-, Viszeral- und Transplantationschirurgie des Universitätsklinikums Heidelberg durchgeführt. Entsprechend dem ärztlichen Berufsrecht erfolgte eine Beratung durch die Ethikkommission der Universität Heidelberg. Es ist geplant, dass insgesamt 60 Patienten an dieser Studie teilnehmen werden.

### **Was ist, wenn ich nicht an der Studie teilnehmen möchte (Freiwilligkeit)?**

Ihre Teilnahme an dieser Studie ist freiwillig. Sie werden in diese Studie also nur dann einbezogen, wenn Sie schriftlich eingewilligt haben. Sofern Sie nicht an der Studie teilnehmen möchten, hat dies keinerlei Nachteile für Sie bezüglich der weiteren Behandlung. Die Operation erfolgt dann entsprechend dem Hausstandard, in der Regel mit Anlage eines vorübergehenden künstlichen Darmausganges.



## **Welche Verfahren werden im Rahmen der Studie angewendet und untersucht?**

### **Behandlungsgruppe A**

Ghost-Ileostomie

### **Behandlungsgruppe B**

Konventionelle Loop-Ileostomie

### **Präoperatives Standardverfahren in beiden Gruppen**

Die Patienten in beiden Gruppen erhalten eine dem Standard entsprechende mechanische Darmvorbereitung (Abführmaßnahmen ähnlich wie vor einer Darmspiegelung) sowie Antibiotika in Tabletten- bzw. Pulverform (Metronidazol + Paromycin). Vor der Operation wird durch den behandelnden Arzt oder eine Stomaschwester die Stelle des zukünftigen Darmausganges markiert.

### **Standardoperationsschritte in beiden Gruppen**

Die eigentliche Operation, die mittels eines Mittellinienbauchschnittes oder auch laparoskopisch (im Sinne der „Schlüssellochchirurgie“) durchgeführt wird, erfolgt ebenfalls in beiden Gruppen nach dem Hausstandard unserer Klinik. Hierbei wird eine sogenannte totale mesorektale Exzision (TME = Entfernung des Mastdarms mitsamt dem ihn umgebenden Fettgewebe) unter Erhalt des Schließmuskels durchgeführt. Im weiteren Verlauf der Operation wird die Verbindung zwischen den Darmenden wiederhergestellt und die Dichtigkeit der Neuverbindung (Anastomose) getestet.

Sofern sich während der Operation keine Probleme ergeben und sich keine Hinweise auf eine Undichtigkeit zeigen, werden Sie dann zufällig einer der beiden Gruppen zugeteilt.

### **Ghost-Ileostomie**

Wenn Sie der Ghost-Ileostomiegruppe zugeteilt werden, wird für die Vorbereitung des Darmausganges für die „Ghost-Ileostomie“ eine Darmschlinge von innen an die Bauchwand gebracht, wobei eine hierfür um die Darmschlinge gelegte Silikonschlinge an der vorher markierten Stelle nach außen geleitet wird. Im Unterschied zur Kontrollgruppe wird der Darm jedoch nicht nach außen geführt, sondern verbleibt unter der Bauchwand (Faszie). Nach der Fertigstellung der Ghost-Ileostomie wird die Operation wie üblich komplettiert und der Bauch verschlossen.

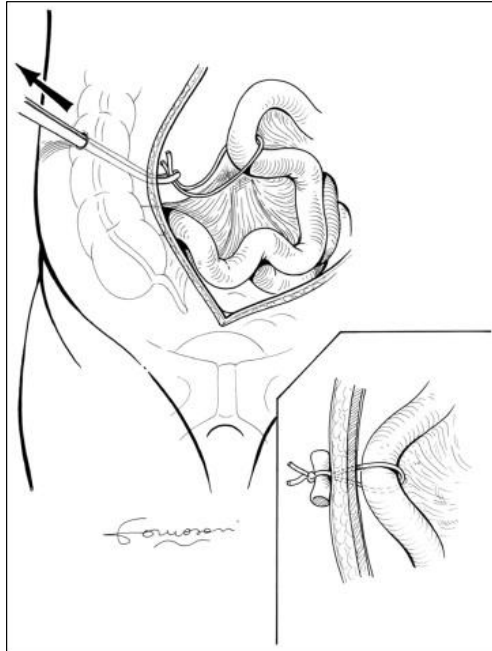

Aus: Miccini M, Amore Bonapasta S, Gregori M, Barillari P, Tocchi A. Ghost ileostomy: real and potential advantages. *Am J Surg.* 2010 Oct;200(4)

Sie werden nach der Operation engmaschig kontrolliert, um Zeichen einer Undichtigkeit sehr schnell zu erkennen. Wir achten hier besonders auf klinische Zeichen wie Fieber, Bauchfellentzündung (Peritonitis), Luft- oder Stuhlabgang über die im Bauchraum eingelegten Drainagen, Erhöhung der Entzündungswerte im Blut über das nach der Operation erwartete Maß hinaus sowie radiologische oder bei der körperlichen Untersuchung auftretende klinische Hinweise.

Sollte bei Ihnen der Verdacht auf eine Undichtigkeit (Anastomoseninsuffizienz) bestehen, wird die im Rahmen der Ghost-Ileostomie vorbereitete Darmschlinge unter Vollnarkose in einer zweiten, kurzen Operation als Dünndarmausgang (doppelläufiges Ileostoma) nach außen geleitet. Weitere diagnostische oder therapeutische Maßnahmen wie z.B. eine Computertomographie (radiologisches Untersuchungsverfahren mit Schnittbildern des Körpers), bei der ggf. auch eine Drainage in den Bauchraum eingelegt werden kann, werden nach Maßgabe der behandelnden Ärzte und der klinischen Routine bzw. Notwendigkeit durchgeführt.

Sofern nach der Ghost-Ileostomie keine Zeichen der Undichtigkeit bestehen, Sie regelmäßig Stuhlgang haben und normale Kost zu sich nehmen und vertragen, wird die Silikonschlinge zwischen dem fünften und dem zehnten postoperativen Tag auf Ihrer Station im Patientenzimmer entfernt und Sie haben dementsprechend zu keiner Zeit einen künstlichen Darmausgang.

### **Konventionelle Loop-Ileostomie**

Wenn Sie der Ileostomiegruppe zugeteilt werden, erfolgen alle Operationsschritte entsprechend dem üblichen Standardverfahren. Die für den Darmausgang vorgesehene Darmschlinge wird nach außen geleitet und dort eröffnet. Da beide Enden des Darmes, also das zuführende und das abführende Ende an der Bauchdecke angenäht werden, handelt es sich um ein sogenanntes „doppelläufiges“ Ileostoma. Abschließend wird ein Stomabeutel auf dem Darmausgang befestigt.



### **Verschluss des Darmausganges**

Der Verschluss des Dünndarmausganges (Ileostomas) erfolgt üblicherweise frühestens 12 Wochen nach der ersten Operation oder nach Beendigung der Chemotherapie, sollte dies nach der Operation nötig sein. Vor der Verschlussoperation wird noch einmal radiologisch die Dichtigkeit der Anastomose überprüft. Weitere Untersuchungen (z.B. Endoskopie) vor der Operation werden entsprechend den Vorgaben Ihres behandelnden Arztes durchgeführt. Sofern keine Untersuchungsergebnisse gegen einen Verschluss des Darmausganges sprechen, wird dieser Eingriff entsprechend dem Hausstandard durchgeführt.

### **Wie ist der Ablauf der Studie?**

#### **Studiensvisiten (in beiden Gruppen)**

Falls Sie Ihr Einverständnis zur Studienteilnahme erteilen, werden vor der Operation Daten zu Alter, Größe und Gewicht sowie zu Ihrer Krankengeschichte erhoben. Diese Erhebung im Rahmen der Studienteilnahme wird ca. 10 Minuten dauern. Außerdem bitten wir Sie, Fragen zu Ihrer Lebensqualität auszufüllen was noch einmal ca. 5 Minuten in Anspruch nehmen wird. Eine zusätzliche Blutentnahme oder sonstige invasive Untersuchungsmethoden abseits der üblichen Routine sind hierfür nicht notwendig. Auch während der Operation werden verschiedene Daten wie z. B. Operationsdauer, Blutverlust, die genaue Art der Operation (minimal-invasiv/offen), Höhe der Neuverbindung, etc. erfasst und dokumentiert. Während der sechs Monate dauernden Nachbeobachtung werden alle für die Beantwortung der Fragestellung relevanten Daten zum Verlauf Ihrer Genesung und eventuell auftretende Komplikationen dokumentiert. Mitarbeiter des Studienteams werden Sie während Ihres stationären Aufenthaltes am 3., 7. und am 14. Tag (oder am Entlasstag, je nachdem, was früher eintritt) nach der Operation besuchen, um Sie persönlich nach Ihrem Befinden und dem postoperativen Verlauf zu befragen. Einen, drei und sechs Monate nach der Operation werden Sie außerdem von unserem Studienpersonal angerufen und ebenfalls wieder nach Ihrem Befinden und dem weiteren Verlauf (Komplikationen, Lebensqualität, weitere Krankenhausaufenthalte etc.) befragt werden. Alle erforderlichen Untersuchungsbefunde werden im Rahmen Ihrer normalen Versorgung aus Ihren Krankenakten erhoben, sodass für Sie keine weiteren zusätzlichen Untersuchungen oder Termine im Krankenhaus notwendig werden. Die Dauer der Visiten nach Ihrer Operation wird ca. je 10 Minuten betragen. Das Ausfüllen der Fragebögen zur Lebensqualität wird jeweils zusätzlich etwa 5 Minuten betragen.

### **Wie erfolgt die weitere Behandlung?**

Die weitere Behandlung nach der Operation (auch nach der Beendigung Ihrer Studienteilnahme) erfolgt entsprechend den Vorgaben Ihres behandelnden Arztes und den Therapiestandards.

### **Nutzen und Risiken der Studienteilnahme**

Das Risiko einer Undichtigkeit der Neuverbindung der beiden Darmenden liegt entsprechend der vorhandenen Literatur bei maximal 25%. Dies bedeutet, dass das Stoma möglicherweise bei drei Vierteln der Patienten, die nach der aktuellen Routine einen künstlichen Darmausgang erhalten, verzichtbar wäre. Durch die Studienteilnahme haben Sie den potentiellen Nutzen, entgegen den üblichen Standards keinen künstlichen Darmausgang zu erhalten und auch keine zweite Operation zur Rückverlagerung des Stomas durchmachen zu müssen. Jedoch steht diesem potentiellen Nutzen das Risiko gegenüber, dass die Konsequenzen einer möglichen Undichtigkeit der Neuverbindung am Mastdarm



schwerwiegender verlaufen können und weitere Maßnahmen notwendig werden wie z.B. Reoperationen oder Intensivtherapie.

Sie helfen mit Ihrer Teilnahme an dieser Studie auch mit, die Behandlung auf diesem Gebiet weiterzuentwickeln, so dass zukünftigen Patienten klarere Empfehlungen zur Therapie gegeben werden können.

Insbesondere die onkologische Behandlung, d.h. die Behandlung Ihrer Tumorerkrankung wird durch die Studienteilnahme nicht beeinflusst.

#### **Mögliche Nebenwirkungen und Komplikationen der Ghost-Ileostomie:**

- Unterlegenheit des Verfahrens gegenüber der konventionellen Ileostomie: Es besteht prinzipiell das Risiko, dass die „Ghost-Ileostomie“ die Konsequenzen einer Undichtigkeit weniger effektiv abmildern kann als die konventionelle Ileostomie.
- Denkbar kann eine Verdrehung (Torsion) des Dünndarmes um die Silikonschlinge mit der Folge eines Darmverschlusses oder einer Schädigung der Darmwand durch die Silikonschlinge. Diese Komplikation wurde jedoch bislang in keiner der bisherigen Studien beobachtet und somit ist deren Häufigkeit nicht bekannt.
- Gelegentlich (bei bis zu 1 von 100 Behandelten) besteht die Notwendigkeit einer zweiten Operation sofern der Verdacht auf eine Undichtigkeit besteht (siehe Ghost-Ileostomie, Seite 3)

#### **Mögliche Nebenwirkungen und Komplikationen der konventionellen Ileostomie:**

- Häufig (bei bis zu 1 von 10 Behandelten) treten Entzündungen im Bereich des Ileostomas (peristomaler Abszess) unterschiedlicher Ausprägung auf
- Häufig (bei bis zu 1 von 10 Behandelten) treten Bauchwandbrüche im Bereich des Ileostomas (parastomale Hernie) auf
- Sehr häufig (bei > 1 von 10 Behandelten) kommt es zu hohen Flüssigkeitsverlusten über das Stoma, damit verbunden eine Austrocknung des Körpers (Dehydratation) und in seltenen Fällen ggf. eine Nierenfunktionsstörung bis hin zum akuten Nierenversagen und der Notwendigkeit einer Blutwäsche (Dialyse).
- Risiken der zweiten Operation zum Verschluss des Stomas:
  - Narkoserisiko
  - Undichtigkeit der erneut verbundenen Dünndarmschlingen (gelegentlich; bis zu 1 von 100 Behandelten)
  - Postoperativer Darmverschluss (häufig; bis zu 1 von 10 Behandelten)
  - Wundinfektion (häufig; bis zu 1 von 10 Behandelten)
  - Narbenhernie (Häufigkeit nicht bekannt)
  - Notwendigkeit einer komplikationsbedingten erneuten Operation (gelegentlich; bis zu 1 von 100 Behandelten)

Im Rahmen der Studie werden Sie engmaschig auf etwaig auftretende unerwünschte Ereignisse hin überwacht.

#### **Wie erfolgt die Zuteilung zu den Behandlungsgruppen?**





Wenn Sie der Teilnahme an der Studie zustimmen, erfolgt die zufällige Zuteilung zu einer der beiden Behandlungsgruppen. Dieses zufällige Zuteilungsverfahren (Randomisation) hat den Zweck, die beiden Verfahren objektiv miteinander vergleichen zu können und eine möglichst hohe wissenschaftliche Aussagekraft der Untersuchung zu erreichen. Die Zuteilung in die Gruppen erfolgt gleichmäßig im Verhältnis 1:1, d. h. die Wahrscheinlichkeit beträgt für jede der beiden Behandlungsgruppen 50%. Die Randomisation, die während der Operation erfolgt, wird nur dann durchgeführt, wenn während der Operation keine Probleme aufgetreten sind und keine Gründe vorliegen, die einen künstlichen Darmausgang zwingend erforderlich machen.

### **Wer organisiert und finanziert die Studie?**

Die GHOST Studie wird von der Klinik für Allgemein-, Viszeral- und Transplantationschirurgie der Universitätsklinik Heidelberg durchgeführt und von der Heidelberger Stiftung Chirurgie finanziell unterstützt.

### **Was ist, wenn ich zu einem späteren Zeitpunkt nicht mehr an der Studie teilnehmen möchte?**

Sie können Ihre Einwilligung jederzeit ohne Angabe von Gründen und ohne Nachteile für Ihre weitere medizinische Versorgung zurückziehen. Wenn Sie Ihre Einwilligung widerrufen möchten, wenden Sie sich bitte an die Studienleitung oder das Sie behandelnde Personal. Bei einem Widerruf können Sie entscheiden, ob die von Ihnen studienbedingt erhobenen Daten gelöscht werden sollen oder weiterhin für die Zwecke der Studie verwendet werden dürfen. Auch wenn Sie einer weiteren Verwendung zunächst zustimmen, können Sie nachträglich Ihre Meinung noch ändern und die Löschung verlangen; wenden Sie sich dafür bitte ebenfalls an die Studienleitung oder das Sie behandelnde Personal. Bitte beachten Sie, dass Daten, die bereits in wissenschaftliche Auswertungen eingeflossen sind oder Daten, die bereits anonymisiert\* wurden, nicht mehr auf Ihren Wunsch gelöscht werden können.

\*„Anonymisierung“ ist das Verändern personenbezogener Daten in der Weise, dass die betroffene Person nicht mehr oder nur mit einem unverhältnismäßig großen Kosten- oder Zeitaufwand identifiziert werden kann.

### **Welche Daten werden erhoben und wie sind die Daten geschützt (Datenschutz)?**

Die ärztliche Schweigepflicht und datenschutzrechtliche Bestimmungen werden eingehalten. Während der Studie werden medizinische Befunde und/oder persönliche Informationen von Ihnen erhoben und in der Prüfstelle in Ihrer persönlichen Akte niedergeschrieben oder elektronisch gespeichert. Die für die Studie wichtigen Daten werden zusätzlich in pseudonymisierter Form\* gespeichert und zur Auswertung an Dr. Pascal Probst (Klinik für Allgemein-, Viszeral- und Transplantationschirurgie) weitergegeben. Eine Entschlüsselung ist nur bei Rücktritt von der Studie zum Zweck der Datenvernichtung vorgesehen. Sobald es nach dem Forschungs- oder Statistikzweck möglich ist, werden die personenbezogenen Daten anonymisiert. Die Daten sind gegen unbefugten Zugriff gesichert. Die über Sie in der Studie erhobenen Daten werden für die Dauer von 10 Jahren nach Beendigung oder Abbruch der klinischen Studie aufbewahrt und danach gelöscht.

*\*Pseudonymisierung ist die Verarbeitung personenbezogener Daten in einer Weise, dass die personenbezogenen Daten ohne Hinzuziehung zusätzlicher Informationen („Schlüssel“) nicht mehr einer spezifischen betroffenen Person zugeordnet werden können. Diese zusätzlichen Informationen werden dabei gesondert aufbewahrt und unterliegen technischen und organisatorischen Maßnahmen, die gewährleisten, dass die personenbezogenen Daten nicht einer identifizierten oder identifizierbaren natürlichen Person zugewiesen werden.*



Die Studienleitung wird alle angemessenen Schritte unternehmen, um den Schutz Ihrer Daten gemäß den Datenschutzstandards der Europäischen Union zu gewährleisten.

Die Daten werden ausschließlich zu Zwecken dieser Studie verwendet. Die Ergebnisse der Studie dienen zur Fallzahlplanung einer Folgestudie. Sie haben das Recht, vom Verantwortlichen (s.u.) Auskunft über die von Ihnen gespeicherten personenbezogenen Daten zu verlangen. Ebenfalls können Sie die Berichtigung unzutreffender Daten sowie die Löschung der Daten oder Einschränkung deren Verarbeitung verlangen.

Der Verantwortliche für die studienbedingte Erhebung personenbezogener Daten ist:

Prof. Dr. med. Markus K. Diener  
Telefon: 06221-5636986  
E-Mail: [markus.diener@med.uni-heidelberg.de](mailto:markus.diener@med.uni-heidelberg.de)

Bei Anliegen zur Datenverarbeitung und zur Einhaltung der datenschutzrechtlichen Anforderungen können Sie sich an den Datenschutzbeauftragten des Uniklinikums Heidelberg wenden.

Postadresse:  
Datenschutzbeauftragter des Universitätsklinikums Heidelberg  
Im Neuenheimer Feld 130.3  
69120 Heidelberg  
[Datenschutz@med.uni-heidelberg.de](mailto:Datenschutz@med.uni-heidelberg.de)

Im Falle einer rechtswidrigen Datenverarbeitung haben Sie das Recht, sich bei folgender Aufsichtsbehörde zu beschweren:

Der Landesbeauftragte für den Datenschutz und die Informationsfreiheit Baden- Württemberg  
Postfach 10 29 32, 70025 Stuttgart  
Königstraße 10a, 70173 Stuttgart  
Tel.: 0711/61 55 41 – 0  
Fax: 0711/61 55 41 – 15  
E-Mail: [poststelle@lfdi.bwl.de](mailto:poststelle@lfdi.bwl.de)  
Internet: <http://www.baden-wuerttemberg.datenschutz.de>

Für die Zwecke der Studie ist es nützlich, auch Daten aus Ihrer Krankenakte bei Ihrem Hausarzt einzubeziehen. Wir möchten Sie bitten, einer Weitergabe dieser Daten an die Studienleitung zuzustimmen und Ihren Hausarzt insoweit von der Schweigepflicht zu entbinden.

### **Was geschieht mit den Ergebnissen der Studie?**

Ihre Daten werden in pseudonymisierter Form analysiert, in zusammengefasster Form publiziert und somit für andere Ärzte und damit zukünftige Patienten nutzbar gemacht.

### **Entstehen mir durch die Teilnahme Kosten? Erhalte ich eine Bezahlung bzw. Aufwandsentschädigung?**

Die Studienteilnahme ist für Sie kostenlos. Sie erhalten allerdings auch keine Bezahlung.



**Haben Sie weitere Fragen?**

Sollten Sie noch weitere Fragen zu Ihrer Erkrankung, den eingesetzten Operationsverfahren oder dem Studienablauf haben, so zögern Sie nicht, diese Ihrem behandelnden Arzt zu stellen. Er wird diese Fragen gerne ausführlich beantworten.

Für Rückfragen stehen Ihnen folgende Personen zur Verfügung:

**Ihr aufklärender Studienarzt:**

Name: \_\_\_\_\_

**Studienleitung:**

Name: Prof. Dr. med. Markus K. Diener

Über die allgemeinen Ergebnisse und den Ausgang der Studie können Sie sich über das Studienzentrum informieren:

Klinisches Studienzentrum KSC  
Klinik für Allgemein-, Viszeral- und Transplantationschirurgie  
Universitätsklinikum Heidelberg  
Im Neuenheimer Feld 110, 69120 Heidelberg  
Tel.: 06221/56-36209

*Wir bedanken uns für Ihre Unterstützung.*

*Eine Ausfertigung des Dokumentes ist für den Verbleib bei Ihnen bestimmt.*



Studienleiter  
Prof. Dr. med. Markus Diener  
Klinik für Allgemein-, Viszeral-  
und Transplantationschirurgie  
Universitätsklinikum Heidelberg  
Im Neuenheimer Feld 110  
69120 Heidelberg  
Tel. 06221-566986

## Einwilligungserklärung

### GHOST Studie

#### Randomisiert, kontrollierte Development-Studie zum Vergleich der Ghost-Ileostomie gegenüber der klassischen Loop-Ileostomie nach tiefer anteriorer Rektumresektion beim Rektumkarzinom – die Ghost-Studie

(Englischer Titel: Randomized controlled development trial to compare ghost-ileostomy versus conventional loop ileostomy in patients undergoing low anterior resection for rectal cancer – the GHOST-trial)

Ich bin heute in einem ausführlichen Aufklärungsgespräch über Art, Umfang und Bedeutung dieser klinischen Studie aufgeklärt worden. Dabei wurden u. a. Studienziel und Studiendauer, studienbedingte Erfordernisse und mögliche Risiken und Unannehmlichkeiten im Rahmen der Studienteilnahme besprochen. Die Patienteninformation sowie ein Exemplar der Einwilligungserklärung habe ich erhalten, gelesen und verstanden. In diesem Zusammenhang bestehende Fragen wurden besprochen und beantwortet.

Folgende Fragen/ sonstige Aspekte wurden zusätzlich besprochen:

---

---

---

---

Mir ist bekannt, dass diese Studie in erster Linie der medizinischen Wissenserweiterung dient und gegebenenfalls auch keinen persönlichen Vorteil für mich bringen kann.

Ich stimme der Teilnahme an der oben genannten Studie freiwillig zu. Für meine Entscheidung hatte ich ausreichend Zeit. Ich weiß, dass ich meine Zustimmung jederzeit ohne Begründung und ohne Nachteile für meine weitere medizinische Versorgung widerrufen kann.

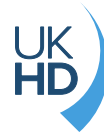**Datenschutz**

Mir ist bekannt, dass bei dieser Studie personenbezogene Daten, insbesondere medizinische Befunde über mich erhoben, gespeichert und ausgewertet werden sollen. Die Verarbeitung der Daten erfolgt nach gesetzlichen Bestimmungen und setzt gemäß Art. 6 Abs. 1 lit. a der Datenschutz-Grundverordnung folgende Einwilligungserklärung voraus: Ich wurde darüber aufgeklärt und stimme freiwillig zu, dass meine in der Studie erhobenen Daten, insbesondere Angaben über meine Gesundheit, zu den in der Informationsschrift beschriebenen Zwecken in pseudonymisierter Form aufgezeichnet, ausgewertet und ggf. auch in pseudonymisierter Form weitergegeben werden können. Dritte erhalten keinen Einblick in personenbezogene Unterlagen. Bei der Veröffentlichung von Ergebnissen der Studie wird mein Name ebenfalls nicht genannt.

Die im Rahmen dieser Studie erhobenen Daten/Krankheitsdaten werden auf Fragebögen und Dokumentationsbögen dokumentiert und zur wissenschaftlichen Auswertung pseudonymisiert weitergegeben an:

- Prof. Dr. med. Markus Diener, Klinik für Allgemein-, Viszeral- und Transplantationschirurgie, Universitätsklinikum Heidelberg, Im Neuenheimer Feld 110, 69120 Heidelberg (Studienleiter).

- Dr. med. Pascal Probst, Klinik für Allgemein-, Viszeral- und Transplantationschirurgie, Universitätsklinikum Heidelberg, Im Neuenheimer Feld 110, 69120 Heidelberg (Datenmanagement).

Bei der Veröffentlichung von Ergebnissen der Studie wird mein Name ebenfalls nicht genannt.

Die personenbezogenen Daten werden anonymisiert, sobald dies nach dem Forschungszweck möglich ist. Die Daten werden nach Studienabschluss 10 Jahre aufbewahrt. Danach werden alle personenbezogenen Daten gelöscht, soweit zu diesem Zeitpunkt nicht gesetzliche, satzungsmäßige oder vertragliche Aufbewahrungsfristen dem entgegenstehen.

Außerdem erkläre ich mich damit einverstanden, dass autorisierte und zur Verschwiegenheit verpflichtete Beauftragte des Studienleiters, sogenannte Monitore (Studienzentrum der Deutschen Gesellschaft für Chirurgie (SDGC)) in meine beim Prüfarzt vorhandenen personenbezogenen Daten, insbesondere meine Gesundheitsdaten, Einsicht nehmen, soweit dies für die Überprüfung der ordnungsgemäßen Durchführung der Studie notwendig ist. Für diese Maßnahme entbinde ich den Prüfarzt von der ärztlichen Schweigepflicht.

Ich bin damit einverstanden, dass Gesundheitsdaten von meinem Hausarzt für die Zwecke der Studie erhoben werden. Insoweit entbinde ich meinen Hausarzt von der Schweigepflicht (falls nicht gewünscht, bitte streichen)

Name des Hausarztes \_\_\_\_\_

Mir ist bekannt, dass diese Einwilligung jederzeit schriftlich oder mündlich ohne Angabe von Gründen widerrufen werden kann, ohne dass mir dadurch Nachteile entstehen. Die Rechtmäßigkeit der bis zum Widerruf erfolgten Datenverarbeitung wird davon nicht berührt. In diesem Fall kann ich entscheiden, ob die von mir erhobenen Daten gelöscht werden sollen oder weiterhin für die Zwecke der Studie verwendet werden dürfen.



Bei Rücktritt von der Studie bin ich mit der Auswertung des schon gewonnenen Materials und der schon vorhandenen Daten einverstanden (Zutreffendes bitte ankreuzen).

Ja       Nein

---

Vor-/Nachname des Patienten (in Druckbuchstaben)      Geburtsdatum

---

Unterschrift des Patienten      Datum (vom Patienten einzutragen)

---

Name des Studienarztes (Druckbuchstaben)      Datum (vom Studienarzt einzutragen)      Unterschrift des Studienarztes
